# Supplementary material
Source: PubMed Central journal article supplement (PMC4787936)
Supplement: colg772384.w1_default.pdf [file colg772384.w1_default.pdf]

Online Table 1: QRISK2 - NICE Framingham reclassification (Men) into low, intermediate and high risk

| NICE Framingham |                    | QRISK2                     |                         |                         |                           | TOTALS                     | Number reclassified (%) |
|-----------------|--------------------|----------------------------|-------------------------|-------------------------|---------------------------|----------------------------|-------------------------|
|                 |                    | Low                        | Intermediate            |                         | High                      |                            |                         |
|                 |                    | < 10%                      | 10% – 15%               | 15% – 20%               | ≥ 20%                     |                            |                         |
| <10%            | n (range)          | 372225<br>(352715, 394547) | 7033<br>(6427, 7865)    | 2965<br>(2754, 3243)    | 2103<br>(1912, 2288)      | 384326<br>(364057, 407610) | 12101<br>(3.1)          |
|                 | CVD events (range) | 5830 (5172, 6505)          | 449 (370, 583)          | 167 (136, 221)          | 134 (117, 147)            | 6580 (5824, 7416)          |                         |
|                 | Observed risk      | 2.89 (2.48 to 3.29)        | 10.94 (8.79 to 13.10)   | 10.85 (8.20 to 13.51)   | 13.34 (9.79 to 16.90)     | 3.14 (2.70 to 3.57)        |                         |
|                 | Mean risk QRISK2   | 2.90 (2.85 to 2.95)        | 12.00 (11.95 to 12.06)  | 17.27 (17.19 to 17.34)  | 23.42 (23.21 to 23.62)    | 3.29 (3.19 to 3.39)        |                         |
|                 | Mean risk NICE     | 5.44 (5.34 to 5.53)        | 6.97 (6.45 to 7.49)     | 6.43 (5.50 to 7.37)     | 7.06 (6.40 to 7.72)       | 5.48 (5.36 to 5.60)        |                         |
| 10%-15%         | n (range)          | 107871<br>(103668, 110696) | 20554<br>(18861, 22316) | 4977<br>(4510, 5465)    | 2508<br>(2145, 2938)      | 135910<br>(133685, 138657) | 115356<br>(84.9)        |
|                 | CVD events (range) | 3833 (3593, 4035)          | 1623 (1400, 1859)       | 587 (470, 708)          | 276 (246, 337)            | 6319 (5757, 6860)          |                         |
|                 | Observed risk      | 6.10 (5.58 to 6.62)        | 12.26 (10.40 to 14.12)  | 18.24 (14.38 to 22.10)  | 19.18 (14.79 to 23.58)    | 7.68 (6.85 to 8.52)        |                         |
|                 | Mean risk QRISK2   | 6.34 (6.28 to 6.41)        | 11.89 (11.84 to 11.93)  | 16.98 (16.93 to 17.02)  | 24.65 (24.13 to 25.18)    | 7.91 (7.69 to 8.13)        |                         |
|                 | Mean risk NICE     | 12.16 (12.12 to 12.20)     | 12.94 (12.91 to 12.97)  | 13.04 (12.95 to 13.12)  | 12.79 (12.56 to 13.01)    | 12.32 (12.28 to 12.36)     |                         |
| 15%-20%         | n (range)          | 35846<br>(31592, 39159)    | 34080<br>(32712, 35727) | 13627<br>(12367, 14800) | 6620<br>(5874, 7480)      | 90170<br>(87088, 93799)    | 76546<br>(84.9)         |
|                 | CVD events (range) | 1601 (1526, 1725)          | 2617 (2446, 2819)       | 1552 (1356, 1717)       | 925 (766, 1074)           | 6695 (6249, 7168)          |                         |
|                 | Observed risk      | 7.53 (6.50 to 8.56)        | 12.16 (11.20 to 13.12)  | 17.42 (14.91 to 19.93)  | 22.00 (18.57 to 25.43)    | 11.78 (10.62 to 12.94)     |                         |
|                 | Mean risk QRISK2   | 8.05 (7.98 to 8.12)        | 12.16 (12.09 to 12.23)  | 17.09 (17.04 to 17.15)  | 24.07 (23.67 to 24.47)    | 12.15 (11.70 to 12.60)     |                         |
|                 | Mean risk NICE     | 16.89 (16.85 to 16.94)     | 17.53 (17.46 to 17.59)  | 17.79 (17.74 to 17.84)  | 17.91 (17.86 to 17.96)    | 17.34 (17.32 to 17.37)     |                         |
| ≥20%            | n (range)          | 5183<br>(4146, 6120)       | 33008<br>(28037, 37371) | 41402<br>(37566, 44763) | 95731<br>(85884, 105245)  | 175324<br>(155674, 193429) | 79593<br>(45.4)         |
|                 | CVD events (range) | 236 (210, 275)             | 2458 (2172, 2722)       | 4430 (4071, 4609)       | 15690 (14410, 17014)      | 22814 (21157, 24563)       |                         |
|                 | Observed risk      | 7.70 (5.76 to 9.65)        | 11.93 (10.05 to 13.81)  | 16.45 (14.80 to 18.10)  | 24.52 (22.74 to 26.31)    | 19.76 (17.97 to 21.55)     |                         |
|                 | Mean risk QRISK2   | 8.99 (8.95 to 9.03)        | 12.77 (12.74 to 12.80)  | 17.49 (17.46 to 17.52)  | 28.87 (28.45 to 29.29)    | 22.57 (22.20 to 22.94)     |                         |
|                 | Mean risk NICE     | 21.69 (21.60 to 21.78)     | 23.75 (23.49 to 24.01)  | 26.69 (26.03 to 27.35)  | 35.47 (33.59 to 37.36)    | 30.79 (29.59 to 31.98)     |                         |
| TOTALS          | n (range)          | 521125<br>(508556, 534767) | 94675<br>(91661, 97412) | 62971<br>(60758, 65078) | 106962<br>(98293, 115929) | 785733                     | 283596<br>(36.1)        |
|                 | CVD events (range) | 11500 (10721, 12266)       | 7147 (6951, 7386)       | 6736 (6558, 6919)       | 17025 (15917, 18167)      | 42408                      |                         |
|                 | Observed risk      | 4.00 (3.68 to 4.32)        | 12.02 (11.22 to 12.82)  | 16.59 (15.43 to 17.75)  | 24.12 (22.68 to 25.56)    | 9.00 (8.90 to 9.10)        |                         |
|                 | Mean risk QRISK2   | 4.03 (3.92 to 4.14)        | 12.30 (12.27 to 12.33)  | 17.35 (17.32 to 17.38)  | 28.37 (27.88 to 28.86)    | 9.41 (8.88 to 9.94)        |                         |
|                 | Mean risk NICE     | 7.78 (7.47 to 8.09)        | 17.91 (17.26 to 18.56)  | 22.73 (21.76 to 23.70)  | 33.30 (31.20 to 35.39)    | 13.68 (12.63 to 14.72)     |                         |

Online Table 2: QRISK2 - NICE Framingham reclassification (Women) into low, intermediate and high risk

| NICE Framingham |                    | QRISK2                     |                         |                         |                         | TOTALS                     | Number reclassified (%) |
|-----------------|--------------------|----------------------------|-------------------------|-------------------------|-------------------------|----------------------------|-------------------------|
|                 |                    | Low                        | Intermediate            |                         | High                    |                            |                         |
|                 |                    | < 10%                      | 10% – 15%               | 15% – 20%               | ≥ 20%                   |                            |                         |
| <10%            | n (range)          | 557714<br>(546789, 565598) | 20113<br>(18748, 21378) | 6520<br>(6021, 7096)    | 1444<br>(1186, 1782)    | 585791<br>(574080, 594753) | 28077<br>(4.8)          |
|                 | CVD events (range) | 7988 (7389, 8428)          | 1552 (1356, 1692)       | 612 (542, 677)          | 172 (142, 192)          | 10324 (9462, 10912)        |                         |
|                 | Observed risk      | 2.45 (2.23 to 2.68)        | 12.33 (10.65 to 14.02)  | 15.25 (12.60 to 17.90)  | 20.57 (15.10 to 26.05)  | 2.97 (2.68 to 3.27)        |                         |
|                 | Mean risk QRISK2   | 2.47 (2.43 to 2.50)        | 12.07 (12.05 to 12.10)  | 16.89 (16.75 to 17.04)  | 23.14 (22.90 to 23.38)  | 3.01 (2.90 to 3.12)        |                         |
|                 | Mean risk NICE     | 3.45 (3.38 to 3.53)        | 7.05 (6.85 to 7.26)     | 7.05 (6.53 to 7.58)     | 7.27 (6.63 to 7.91)     | 3.63 (3.52 to 3.73)        |                         |
| 10%-15%         | n (range)          | 52444<br>(50389, 56468)    | 27993<br>(26894, 29074) | 13885<br>(13444, 14463) | 4971<br>(4690, 5322)    | 99293<br>(95560, 105327)   | 71300<br>(71.8)         |
|                 | CVD events (range) | 2112 (2033, 2180)          | 2087 (2028, 2171)       | 1501 (1385, 1571)       | 691 (652, 740)          | 6391 (6239, 6555)          |                         |
|                 | Observed risk      | 6.30 (5.72 to 6.89)        | 11.04 (10.25 to 11.84)  | 15.69 (13.89 to 17.48)  | 20.75 (18.55 to 22.94)  | 9.67 (8.99 to 10.35)       |                         |
|                 | Mean risk QRISK2   | 6.99 (6.94 to 7.05)        | 12.22 (12.19 to 12.26)  | 17.13 (17.10 to 17.17)  | 23.36 (23.24 to 23.49)  | 10.71 (10.55 to 10.87)     |                         |
|                 | Mean risk NICE     | 11.96 (11.92 to 11.99)     | 12.46 (12.41 to 12.51)  | 12.67 (12.62 to 12.72)  | 12.93 (12.88 to 12.99)  | 12.25 (12.22 to 12.28)     |                         |
| 15%-20%         | n (range)          | 11336<br>(10278, 12707)    | 18567<br>(17632, 20117) | 13795<br>(12888, 14534) | 9333<br>(8818, 9913)    | 53031<br>(50789, 56945)    | 39236<br>(74.0)         |
|                 | CVD events (range) | 516 (480, 573)             | 1408 (1257, 1519)       | 1466 (1366, 1549)       | 1278 (1198, 1375)       | 4668 (4370, 4992)          |                         |
|                 | Observed risk      | 7.08 (5.85 to 8.30)        | 11.24 (10.11 to 12.38)  | 15.33 (14.12 to 16.54)  | 19.66 (18.16 to 21.16)  | 12.90 (12.11 to 13.70)     |                         |
|                 | Mean risk QRISK2   | 8.10 (8.05 to 8.15)        | 12.45 (12.41 to 12.50)  | 17.32 (17.28 to 17.35)  | 23.96 (23.85 to 24.08)  | 14.82 (14.54 to 15.09)     |                         |
|                 | Mean risk NICE     | 16.79 (16.73 to 16.84)     | 17.20 (17.14 to 17.25)  | 17.39 (17.35 to 17.43)  | 17.61 (17.57 to 17.65)  | 17.23 (17.20 to 17.26)     |                         |
| ≥20%            | n (range)          | 1617<br>(1360, 1979)       | 9219<br>(7938, 10588)   | 14642<br>(12890, 16077) | 33780<br>(30423, 36205) | 59258<br>(52611, 64332)    | 25478<br>(43.0)         |
|                 | CVD events (range) | 83 (69, 95)                | 689 (620, 785)          | 1574 (1418, 1704)       | 5328 (4888, 6000)       | 7674 (7095, 8544)          |                         |
|                 | Observed risk      | 8.23 (5.18 to 11.29)       | 11.09 (8.17 to 14.02)   | 15.30 (12.71 to 17.88)  | 22.36 (18.94 to 25.78)  | 18.53 (15.46 to 21.60)     |                         |
|                 | Mean risk QRISK2   | 8.81 (8.74 to 8.87)        | 12.84 (12.79 to 12.90)  | 17.59 (17.55 to 17.62)  | 28.19 (27.79 to 28.59)  | 22.66 (22.02 to 23.30)     |                         |
|                 | Mean risk NICE     | 21.94 (21.75 to 22.12)     | 23.35 (23.07 to 23.62)  | 25.05 (24.58 to 25.52)  | 30.97 (30.17 to 31.76)  | 28.07 (27.47 to 28.68)     |                         |
| TOTALS          | n (range)          | 623111<br>(61632, 628832)  | 75892<br>(74521, 78165) | 48842<br>(47606, 51067) | 49528<br>(46059, 52626) | 797373                     | 164091<br>(20.6)        |
|                 | CVD events (range) | 10699 (10203, 11177)       | 5736 (5615, 5876)       | 5153 (5016, 5249)       | 7469 (7047, 8123)       | 29057                      |                         |
|                 | Observed risk      | 2.92 (2.73 to 3.11)        | 11.42 (10.88 to 11.96)  | 15.41 (14.67 to 16.14)  | 21.67 (19.39 to 23.94)  | 5.89 (5.81 to 5.96)        |                         |
|                 | Mean risk QRISK2   | 2.97 (2.87 to 3.06)        | 12.32 (12.28 to 12.36)  | 17.29 (17.24 to 17.33)  | 26.76 (26.42 to 27.10)  | 6.21 (6.01 to 6.42)        |                         |
|                 | Mean risk NICE     | 4.46 (4.28 to 4.64)        | 13.51 (13.09 to 13.93)  | 16.96 (16.35 to 17.58)  | 25.95 (24.95 to 26.94)  | 7.42 (7.10 to 7.75)        |                         |
